# Supplementary material for: HFR1, a bHLH Transcriptional Regulator from Arabidopsis thaliana, Improves Grain Yield, Shade and Osmotic Stress Tolerances in Common Wheat
Source: MDPI journal article supplement (doi:10.3390/ijms231912057), 2022-10-10
Supplement: s1 [file s1]

## Supplementary Materials

**Figure S1.** Identification of the *AtHFR1* transgenic lines and morphology of non-transgenic cv. Fielder (WT) and *AtHFR1* transgenic lines under different light-conditions, high-R/FR, low-R/FR, high-B or low-B conditions.

**Figure S2.** Relative expression level of *AtHFR1* in transgenic wheat lines.

**Figure S3.** Relative expression levels of *TaFT1*, *TaCO1* and *TaCO2*.

**Figure S4.** Grain length and width of the WT (cv. Fielder) and *AtHFR1* transgenic lines.

**Figure S5.** Morphology and chlorophyll contents of the WT (cv. Fielder) and *AtHFR1* transgenic lines (#498 and #511) under long-day condition for 20 days.

**Table S1.** Internode lengths of *AtHFR1* transgenic lines.

**Table S2.** Agronomic traits of *AtHFR1* transgenic lines.

**Table S3.** List of primers used in this study.

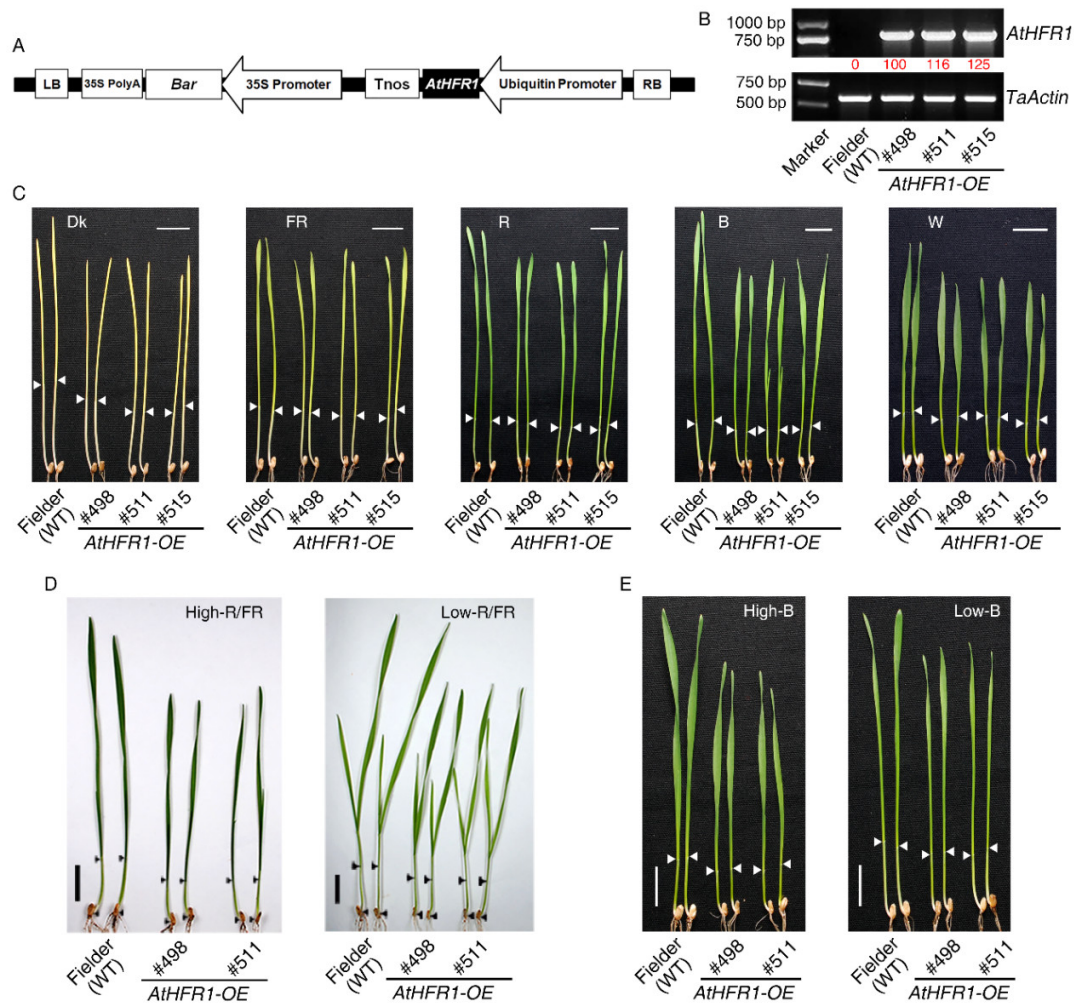

**Figure S1. Identification of the *AtHFR1* transgenic lines and morphology of non-transgenic cv. Fielder (WT) and *AtHFR1* transgenic lines under different light-conditions, high-R/FR, low-R/FR, high-B or low-B conditions.**

(A) Information of recombinant plasmid *pBCXUN-AtHFR1*. (B) Semi-RT-PCR analysis for *AtHFR1* expression in the WT and *AtHFR1* transgenic lines (#498, #511, and #515). Numbers under lanes indicate the relative band intensities to quantify *Actin* and are normalized for each panel. (C) Morphology of the WT and the *AtHFR1* transgenic lines (#498, #511, and #515). Seedlings were grown under dark (Dk), far-red (FR,  $10 \mu\text{mol}\cdot\text{m}^{-2}\cdot\text{s}^{-1}$ ), red (R,  $15 \mu\text{mol}\cdot\text{m}^{-2}\cdot\text{s}^{-1}$ ), blue (B,  $15 \mu\text{mol}\cdot\text{m}^{-2}\cdot\text{s}^{-1}$ ) or white (W,  $100 \mu\text{mol}\cdot\text{m}^{-2}\cdot\text{s}^{-1}$ ) light condition for 7 d. Bar = 2 cm. (D) Morphology of the Fielder and the *AtHFR1* transgenic lines (#498 and #511) under high-R/FR (R,  $96 \mu\text{mol}\cdot\text{m}^{-2}\cdot\text{s}^{-1}$ ; FR,  $21 \mu\text{mol}\cdot\text{m}^{-2}\cdot\text{s}^{-1}$ ; B,  $15 \mu\text{mol}\cdot\text{m}^{-2}\cdot\text{s}^{-1}$ ) or low-R/FR (R  $12 \mu\text{mol}\cdot\text{m}^{-2}\cdot\text{s}^{-1}$ ; FR  $105 \mu\text{mol}\cdot\text{m}^{-2}\cdot\text{s}^{-1}$ ; B  $15 \mu\text{mol}\cdot\text{m}^{-2}\cdot\text{s}^{-1}$ ) for 7 d. Bar = 2 cm. (E) Morphology of the Fielder and the *AtHFR1* transgenic lines (#498 and #511) under high-B ( $50 \mu\text{mol}\cdot\text{m}^{-2}\cdot\text{s}^{-1}$ ) or low-B ( $2 \mu\text{mol}\cdot\text{m}^{-2}\cdot\text{s}^{-1}$ ) for 7 d. Bar = 2 cm. Triangles in (C), (D) and (E) are showing the positions of coleoptile.

Related to Figure 1.

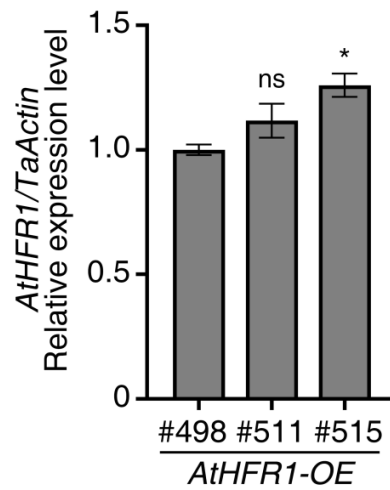

**Figure S2. Relative expression levels of *AtHFR1* in transgenic wheat lines.**

Seedlings grown under long-day condition for 8 days were used to analyze *AtHFR1* expression level. Data are means  $\pm$  SEs,  $n = 3$ . ns indicates no significant difference and asterisks denote significant differences of #498, #511, or #515 with the WT according to ANOVA (\*  $P < 0.05$ ; \*\*  $P < 0.01$ ).

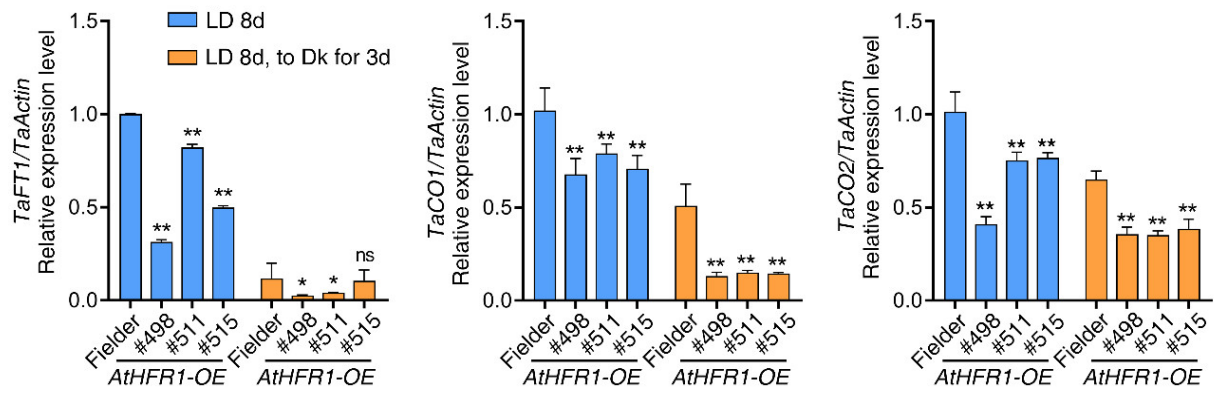

**Figure S3. Relative expression levels of *TaFT1*, *TaCO1* and *TaCO2*.**

Seedlings were grown under long-day conditions for 8 days, and then transferred to the dark for 3 days to eliminate the effect of photoperiod on gene expression. Data are means  $\pm$  SEs,  $n = 3$ . Asterisks denote significant differences of #498, #511, or #515 with the WT according to ANOVA (ns indicates no significant difference; \*  $P < 0.05$ ; \*\*  $P < 0.01$ ).

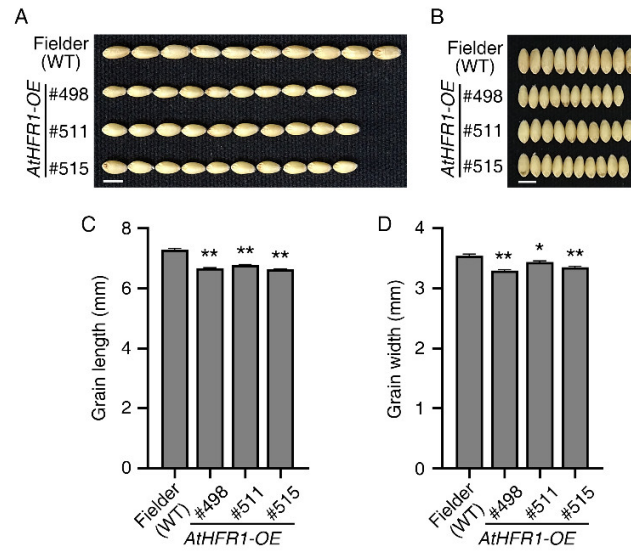

**Figure S4. Grain length and width of the WT (cv. Fielder) and *AtHFR1* transgenic lines.**

Grain morphology showing grain length (A) and grain width (B) and quantification of grain length (C) and grain width (D) of the WT and *AtHFR1* transgenic lines (#498, #511, and #515). Data are means  $\pm$  SEs,  $n = 15$ . Asterisks denote significant differences of #498, #511, or #515 with the WT according to ANOVA (\*  $P < 0.05$ ; \*\*  $P < 0.01$ ).

Related to Figure 4.

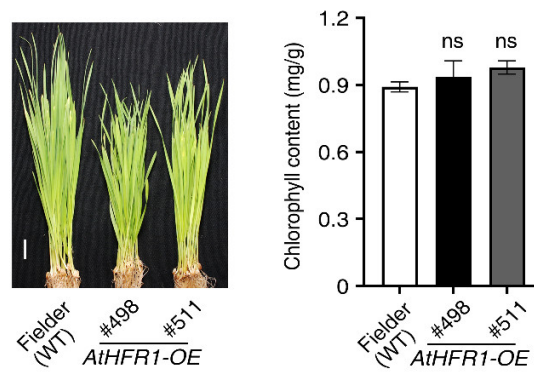

**Figure S5. Morphology and chlorophyll contents of the WT (cv. Fielder) and *AtHFR1* transgenic lines (#498 and #511) under long-day condition for 20 days.**

Data are means  $\pm$  SEs,  $n \geq 5$ . ns indicates no significant difference of #498 or #511 with Fielder according to ANOVA.

Related to Figure 6.

**Table S1. Internode lengths (cm) of *AtHFR1* transgenic lines.**

|                                 |       |              | <i>AtHFR1-OE</i> |                 |                 |
|---------------------------------|-------|--------------|------------------|-----------------|-----------------|
| Fielder (WT)                    |       |              | #498             | #511            | #515            |
| Internode<br>(top to<br>bottom) | spike | 13.1 ± 1.28  | 12.07 ± 0.76 *   | 12.1 ± 1.25 *   | 13.11 ± 1.21    |
|                                 | 1st   | 37.15 ± 4.96 | 27.14 ± 1.88 **  | 26.43 ± 3.46 ** | 28.79 ± 4.32 ** |
|                                 | 2nd   | 25.16 ± 1.68 | 19.26 ± 1.26 **  | 20.52 ± 1.25 ** | 20.53 ± 3.03 ** |
|                                 | 3rd   | 19.3 ± 2.47  | 14.48 ± 1.54 **  | 15.71 ± 2.43 ** | 16.78 ± 2.22 ** |
|                                 | 4th   | 13.3 ± 2.81  | 10.1 ± 1.15 **   | 9.38 ± 3.03 **  | 10.63 ± 1.8 **  |
|                                 | 5th   | 8.62 ± 3.64  | 4.37 ± 1.42 **   | 3.82 ± 1.82 **  | 4.16 ± 1.34 **  |

Materials were planted in field (near Zhengzhou,  $\approx 34.9^\circ$  N,  $\approx 113.6^\circ$  E) from Oct. 2019 to May 2020. After harvest, Internode lengths were measured. Data are means  $\pm$  SDs, Asterisks denote significant differences of #498, #511, or #515 with the WT according to ANOVA (\*  $P < 0.05$ ; \*\*  $P < 0.01$ ).

**Table S2. Agronomic traits of *AtHFR1* transgenic lines.**

|                           | Fielder (WT)  | <i>AtHFR1</i> -OE |                 |                 |
|---------------------------|---------------|-------------------|-----------------|-----------------|
|                           |               | #498              | #511            | #515            |
| Plant height (cm)         | 116 ± 4.87    | 87.66 ± 2.30 **   | 87.11 ± 3.86 ** | 93.24 ± 3.96 ** |
| Spikes per plant          | 22.45 ± 6.81  | 35.67 ± 10.36 **  | 34.41 ± 7.66 ** | 34.28 ± 7.85 ** |
| Heading data (d)          | 181.1 ± 1.78  | 192.2 ± 0.73 **   | 190.8 ± 1.24 ** | 189.2 ± 1.49 ** |
| Thousand-gain weight (g)  | 42.88 ± 4.96  | 30.27 ± 2.38 **   | 36.58 ± 2.50 *  | 35.91 ± 3.16 *  |
| Grain number per spike    | 64.41 ± 6.37  | 59.59±3.89 *      | 61.35 ± 3.42    | 60.76 ± 5.77    |
| Grain yield per plant (g) | 39.23 ± 3.61  | 46.92 ± 4.17 **   | 49.57 ± 7.12 *  | 47.84 ± 6.0 *   |
| Grain length (mm)         | 7.381 ± 0.08  | 6.45 ± 0.1 **     | 6.45 ± 0.06 **  | 6.357 ± 0.11 ** |
| Grain width (mm)          | 3.45 ± 0.11   | 3.186 ± 0.04 **   | 3.286 ± 0.06 *  | 3.243 ± 0.05 ** |
| Length of flag leaf (mm)  | 235.2 ± 12.95 | 156.6 ± 8.43 **   | 160.3 ± 7.04 ** | 163.4 ± 6.49 ** |
| Width of flag leaf (mm)   | 22.06 ± 1.12  | 17.69 ± 0.6 **    | 16.5 ± 0.63 **  | 15.19 ± 0.75 ** |

Materials were planted in field (near Zhengzhou,  $\approx 34.9^\circ$  N,  $\approx 113.6^\circ$  E) from Oct. 2019 to May 2020. The agronomic traits were investigated according to the method described in 4.3. Data are means  $\pm$  SDs. Asterisks denote significant differences of #498, #511, or #515 with the WT according to ANOVA (\*  $P < 0.05$ ; \*\*  $P < 0.01$ ).



**Table S3. List of primers used in this study**

| Gene                                                                   | Primer        | Sequence (5'→3')        | Use                                       | Reference         |
|------------------------------------------------------------------------|---------------|-------------------------|-------------------------------------------|-------------------|
| <i>AtHFR1</i><br>(At1g02340)                                           | AtHFR1-F1     | ATGTCGAATAATCAAGCTTTC   | Gene cloning and vector construction      |                   |
|                                                                        | AtHFR1-R1     | TCATAGTCTTCTCATCGCATG   |                                           |                   |
|                                                                        | AtHFR1-828R   | AGGAACCAAACCGTGAAG      | RT-PCR identification of transgenic lines |                   |
|                                                                        | AtHFR1-28F    | TTGGGATGGAGAAACGAC      |                                           |                   |
| <i>TaACTIN</i><br>(AB181991.1)                                         | TaAct-F2      | CTATCCTTCGTTTGGACCTTG   | As an internal control of RT-PCR          |                   |
|                                                                        | TaAct-R2      | CGGGACCAGACTCATCGT      |                                           |                   |
|                                                                        | Ta-Act F      | TACTCCCTCACAACAACC      | As an internal control of real-time PCR   |                   |
|                                                                        | Ta-Act R      | GCTCCTGCTCATAATCAAG     |                                           |                   |
| <i>TaCAB</i><br>(XM_044587543.1)                                       | TaCAB-QF1     | AAGGTGAAGGAAATCAAGAAC   | Marker gene for photomorphogenesis        |                   |
|                                                                        | TaCAB-QR1     | ACCCTTACCAGTGACGAT      |                                           |                   |
| <i>TaCHS</i><br>(XM_044598705.1,<br>XM_044526325.1)                    | TaCHS-QF1     | ACTACTACTTCAGGGTCACC    | Marker gene for photomorphogenesis        |                   |
|                                                                        | TaCHS-QR1     | ACTTCTCGCACATCCTCT      |                                           |                   |
| <i>TaFT1</i><br>(DQ890162.1)                                           | TaFT-F3       | CAGCAGCCCAGGGTTGAG      | Marker genes for heading                  | Yan et al., 2006  |
|                                                                        | TaFT-R3       | ATCTGGGTCTACCATCACGAGTG |                                           |                   |
| <i>TaCO1</i>                                                           | CO1-AB-F3     | CACATCAGAGTGGTTATGC     | Marker genes for heading                  | Chen et al., 2014 |
|                                                                        | CO1-AB-R3     | GGACTGGACCGTATTGTC      |                                           |                   |
| <i>TaCO2</i>                                                           | CO2-AB-SYB-F4 | AAGGGTGTGAGTGTGTAG      | Marker genes for heading                  | Chen et al., 2014 |
|                                                                        | CO2-AB-SYB-R4 | GATATGTCATTGCTGATGGAAG  |                                           |                   |
| <i>TaSGR</i><br>(XM_044526410.1,<br>XM_044533918.1,<br>XM_044542480.1) | TaSGR-QF      | CGTCCACTGCCACATCTCCG    | Real-time PCR                             |                   |
|                                                                        | TaSGR-QF      | CACGAACGCCTTCAGAACCAC   |                                           |                   |

|                                                          |                            |                                          |               |
|----------------------------------------------------------|----------------------------|------------------------------------------|---------------|
| <i>TaPIL13</i><br>(XM_044530914.1,<br>XM_044530915.1)    | PIL13-QF<br>PIL13-QR       | GACCTCTTCTCGGAGATC<br>TTCGCTGCTTATCATCCT | Real-time PCR |
| <i>TaPIL15-1B</i><br>(XM_044531643.1,<br>XM_044531644.1) | PIL15-1B-QF<br>PIL15-1B-QR | GTCGGAGAGGAGGAGAAG<br>ACGCCTTGTCATCTTGT  | Real-time PCR |
| <i>TaPIL15-1D</i><br>(XM_044592408.1,<br>XM_044592409.1) | PIL15-1D-QF<br>PIL15-1D-QR | GAGAAGGGACCGAATCAA<br>GCCTTGTCGATCTTGTTG | Real-time PCR |

#### Reference

- Yan, L., Fu, D., Li, C., Blechl, A., Tranquilli, G., Bonafede, M., Sanchez, A., Valarik, M., Yasuda, S. and Dubcovsky, J. (2006) The wheat and barley vernalization gene *VRN3* is an orthologue of *FT*. *Proc. Natl. Acad. Sci. USA*, **103**, 19581-19586.
- Chen, A., Li, C., Hu, W., Lau, M.Y., Lin, H., Rockwell, N.C., Martin, S.S., Jernstedt, J.A., Lagarias, J.C. and Dubcovsky, J. (2014) Phytochrome C plays a major role in the acceleration of wheat flowering under long-day photoperiod. *Proc. Natl. Acad. Sci. USA*, **111**, 10037-10044
